# Supplementary material
Source: PubMed Central journal article supplement (PMC7219939)
Supplement: CSS877651_Supplemental_Material.pdf [file CSS877651_Supplemental_Material.pdf]

| <b>Supplementary Table 1. Fit statistics and selection of PCL trajectories – 3 years post PTSD index date (n=1,603)</b>                                                      |                   |                  |                |                                       |                                 |
|------------------------------------------------------------------------------------------------------------------------------------------------------------------------------|-------------------|------------------|----------------|---------------------------------------|---------------------------------|
| <b># Group</b>                                                                                                                                                               | <b>Polynomial</b> | <b>BIC</b>       | <b>Entropy</b> | <b>Group membership probabilities</b> | <b>Avg PP*</b>                  |
| 2                                                                                                                                                                            | 4,4               | -37088.43        | 0.80           | 0.45; 0.55                            | 0.93; 0.94                      |
| 3                                                                                                                                                                            | 4,4,4             | -36629.71        | 0.78           | 0.19; 0.44; 0.37                      | 0.91; 0.88; 0.91                |
| 4                                                                                                                                                                            | 4,4,4,4           | -36513.45        | 0.71           | 0.15; 0.32; 0.33;<br>0.19             | 0.91; 0.82; 0.78;<br>0.84       |
| 5                                                                                                                                                                            | 4,4,4,4,4         | -36409.04        | 0.69           | 0.12; 0.25; 0.12;<br>0.31; 0.20       | 0.88; 0.78; 0.75;<br>0.74; 0.84 |
| <b>3</b>                                                                                                                                                                     | <b>4,4,1</b>      | <b>-36624.90</b> | <b>0.78</b>    | <b>0.20; 0.44; 0.36</b>               | <b>0.91; 0.88; 0.91</b>         |
| * Avg PP – average posterior probability of group membership per group<br>BIC = Bayesian Information Criterion, PTSD = post-traumatic stress disorder; PCL = PTSD check-list |                   |                  |                |                                       |                                 |
